# Supplementary material for: Controllable preparation and structures of two zinc phosphonocarboxylate frameworks with MER and RHO zeolitic topologies
Source: Royal Society of Chemistry journal article supplement (doi:10.1039/c3ce40673c), 2013-01-01
Supplement: c3ce40673c.pdf [file c3ce40673c.pdf]

*Supporting information:*

## **Controllable preparation and structures of two zinc phosphonocarboxylate frameworks with MER and RHO zeolitic topologies**

Mingli Deng, Xiaofeng Liu, Qingshu Zheng, Zhenxia Chen,\* Changye Fang, Bin Yue and Heyong He\*

\*To whom correspondence should be addressed. Email: † [zhxchen@fudan.edu.cn](mailto:zhxchen@fudan.edu.cn), heyonghe@fudan.edu.cn

*Department of Chemistry and Shanghai Key Laboratory of Molecular Catalysis and Innovative Materials, Fudan University, Shanghai 200433, P. R. China.*

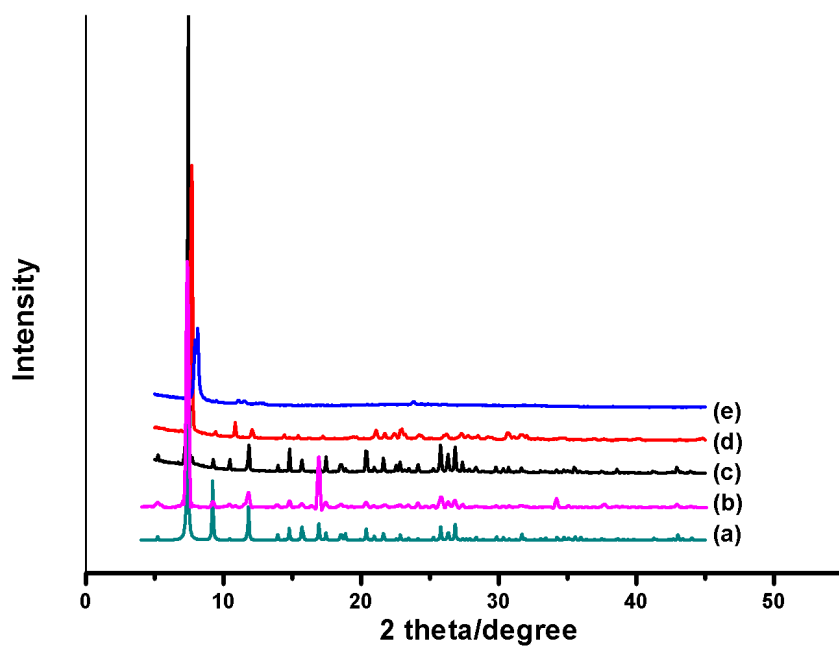

Figure S1. PXRD patterns of the structure **1**. (a) The simulated one based on the single crystal structure, (b) as-synthesized sample, and calcined samples at (c) 90 °C, (d) 150 °C and (e) 200 °C.

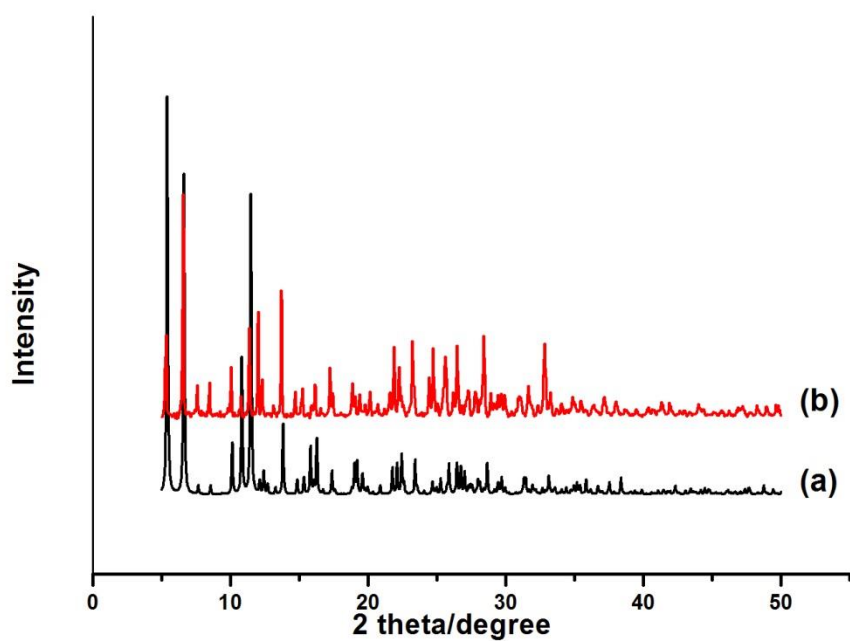

Figure S2. PXRD patterns of the structure **2**. (a) The simulated one based on the single crystal structure, (b) as-synthesized sample.

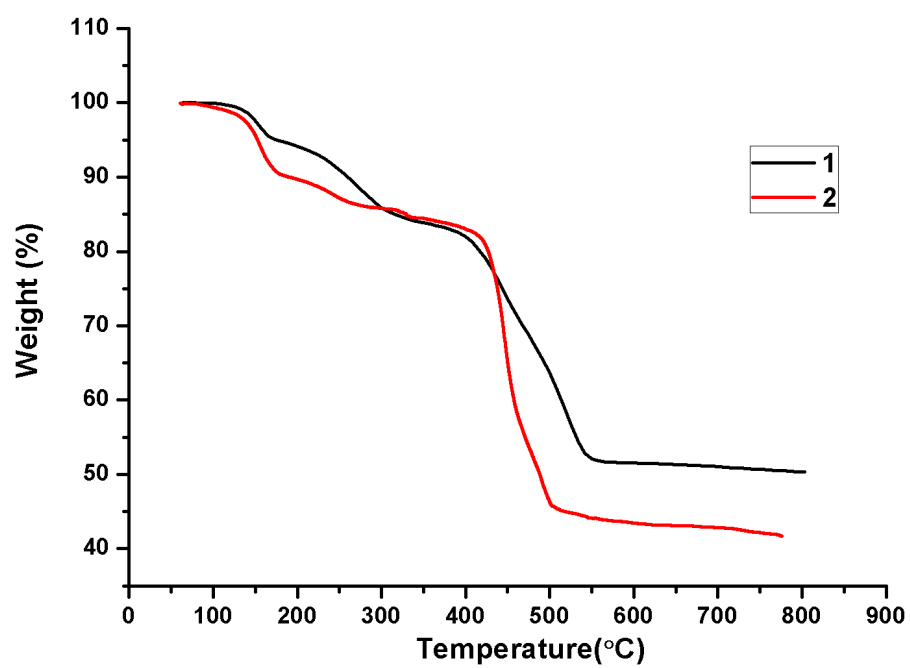

Figure S3. TGA curve of as-synthesized compounds 1 and 2.
